# Supplementary material
Source: PubMed Central journal article supplement (PMC2634925)
Supplement: 0808757105_0808757105SI.pdf [file 0808757105_0808757105SI.pdf]

# Supporting Information

Di Nicolantonio *et al.* 10.1073/pnas.0808757105

## SI Methods

**Cells and Cell Culture Reagents.** The following cell lines were purchased from American Type Culture Collection: hTERT-HME1, MCF10A, hTERT RPE-1, SW48, and DLD-1. hTERT-HME1 and MCF10A were cultured in growth medium containing DMEM/F-12 (Invitrogen) supplemented with 20 ng/mL EGF, 10  $\mu$ g/ml insulin, and 100  $\mu$ g/ml hydrocortisone. DLD-1 and SW48 cells were cultured in DMEM (Invitrogen), while hTERT RPE-1 cells were grown in RPMI-1640 medium (Invitrogen). All cell culture media were supplemented with 10% FBS (Sigma–Aldrich), 50 units/ml penicillin and 50 mg/ml streptomycin. Geneticin (G418) was purchased from Gibco.

**RNA Extraction and cDNA Synthesis.** To confirm the expression of the mutation at the transcriptional level, total RNA was isolated using the SV Total RNA Isolation System kit (Promega) and reverse transcribed as previously described (1). Two  $\mu$ l of the corresponding cDNA were directly amplified using *Taq* DNA polymerase-mediated PCRs. A forward primer and a reverse primer annealing on the homology arm containing each mutation of the different constructs were used to produce the amplicon containing the mutated expressed sequence. The amplicons were sequenced to verify the expression of the introduced mutation at the RNA level.

**Protein Analysis.** SDS PAGE Western blotting was performed as previously described (2). The primary antibodies used for immunoblotting were: Anti-AKT (Cell Signaling, Technology); Anti-phospho-AKT S473 (Cell Signaling, Technology); Anti-Actin and Anti-Vinculin (Sigma–Aldrich); Anti-p44/42 MAP Kinase (Cell Signaling Technology); anti-Phospho-p44/42 Map kinase (Thr202/Tyr204) (Cell Signaling Technology); Anti-phospho-EGFR Receptor (Tyr 1068) and Anti EGFR Receptor (Cell Signaling Technology).

Protein bands were quantified on the films by densitometry, using the software Gel Pro. Analyzer 4.5, 2000.

**Ras Activation Assay.** GST-RAF-RAS binding domain fusion proteins were expressed in *Escherichia coli* by induction with 0.2 mM of isopropyl-1-thio-D-galactopyranoside (IPTG) for 4 h at 30 °C. The expressed fusion proteins were isolated from bacterial lysates by affinity chromatography with glutathione agarose beads. HCT 116 and DLD-1 cells carrying the *KRAS* G13D mutation were used as a control. Cells were serum-starved for 48 h and then lysed. Whole-cell cleared lysate (2 mg) was incubated with 35  $\mu$ g of GST-RAF CRIB for 30 min at 4 °C. The complexes were collected by centrifugation and washed three times with lysis buffer. Proteins were separated by SDS page, followed by Western blot. The *KRAS* protein was detected with Anti-Pan-Ras (Ab-3) mAb (Oncogene, Calbiochem). Signal was developed using the ECL system (Amersham Biosciences).

**Soft Agar Anchorage-Independent Growth Assay.** To assess anchorage-independent growth,  $5 \times 10^5$  cells were mixed 10:1 with 5% agarose in complete growth medium, for a final concentration of 0.5% agarose. The cell mixture was plated on top of a solidified layer of 1% agarose-growth medium in 12-well plates. Cells were supplemented every 2 to 3 days with 200  $\mu$ l of growth complete medium. Cells were stained with 0.02% iodinitrotetrazolium chloride (Sigma–Aldrich) and photographed after 14 days. Images were captured with the ImageReady software (Adobe)

using a microscope (DMIL; Leica) equipped with a digital camera (DFC320; Leica).

**Drug Proliferation Assays.** Parental and KI cells were seeded in 100  $\mu$ l complete growth medium at appropriate density ( $1 \times 10^4$ ,  $4 \times 10^4$ ,  $5 \times 10^4$ , for hTERT RPE-1, hTERT-HME1 and MCF10A cells, respectively) in 96-well plastic culture plates. After serial dilutions, 100  $\mu$ l of drugs in serum-free medium were added to cells with a multichannel pipette. Vehicle and medium-only containing wells were added as controls. Plates were incubated at 37 °C in 5% CO<sub>2</sub> for 96 h, after which cell viability was assessed by ATP content using the CellTiter-Glo Luminescent Assay (Promega). To account for clonal variability, multiple independent clones carrying each of the mutations were generated and analyzed. All luminescence measurements (indicated as relative light units) were recorded by the DTX 880-Multimode plate reader (Beckman–Coulter).

**Pharmacology Data Analysis (Pharmarray).** Cell growth inhibition at each drug concentration was initially normalized to vehicle-treated cells for each clone. Then, within each experiment we calculated a parameter that we named “ $\Delta$  knock-in” ( $\Delta$ KI), corresponding to the difference in the % inhibition between a KI clone and its parental line at each compound concentration and its corresponding signal to noise ratio ( $SNR = |\Delta KI|/\sqrt{\sigma(WT)^2 + \sigma(KI)^2}$ ). To be considered significantly “KI specific” at a given concentration in one experiment, a compound had to simultaneously display a  $|\Delta KI| > 30$  and a  $SNR > 10$ . A minimum of three experiments for each cell line were then summarized by calculating the average and standard deviation of the  $\Delta$ KI values, and finally the averaged  $\Delta$ KI values were included in the final report only when they were greater than  $2\sigma$  and were significant in at least one experiment; we also included in the final analysis averaged  $\Delta$ KI values that were greater than  $3\sigma$ , despite not being significant in any single experiment. All other  $\Delta$ KI values not satisfying the stringent statistical criteria above mentioned were assigned a final 0' score. All of the analyzed  $\Delta$ KI values were visualized using a recently developed gene-expression data analysis program, named GEDAS, publicly available for download (<http://sourceforge.net/projects/gedas>). To allow a direct visualization of the different color shades, all  $\Delta$ KI values were scaled down fivefold. In fact, the maximum and minimum theoretical  $\Delta$ KI values calculated by our method would be +100 (in case of a compound concentration killing 100% KI cells with no effect on the parental line) and –100 (in case of a compound concentration not affecting KI cells while killing all WT cells), respectively, while the GEDAS software allows visualization of data with a maximum fold change of  $\pm 20$ .

**Flow Cytometry Analysis.** For cell cycle analysis, trypsinized cells were washed with PBS and cell nuclei DNA were stained with propidium iodide (PI) for at least 120 min using a commercial kit (DNA con 3, Consul T.S., Orbassano, Italy).

Apoptotic cells were detected by labeling with Alexa Fluor 488-annexin-V conjugated (Molecular Probes V13241, Invitrogen), and counterstained with PI (Molecular Probes, Invitrogen) to distinguish them from necrotic cells.

For time-course experiments, on the initial day cells were labeled with 3  $\mu$ M CFSE [5-(and-6)-carboxyfluorescein diacetate, succinimidyl ester, Invitrogen C1157] in PBS in the dark for 30 min. After washing, baseline fluorescence was recorded

and treatment with erlotinib was initiated, replenishing drugs on a daily basis.

All fluorescence levels were detected by flow cytometry on a FACSCalibur (Becton Dickinson) and analyzed using CellQuest software. The number of events collected for each sample varied between 15,000 and 50,000.

After doublets exclusion, an extended analysis of the DNA content and calculations of the percentage of cells in each phase of the cell-cycle were performed on ModFit Lt software (Verity Software House).

**Statistics.** The NOEL, IC<sub>50</sub> and IC<sub>90</sub> values for each drug were calculated using GraphPad Prism 4.0 software. Where indicated, the results are given as the mean  $\pm$  SD. Statistical analyses were performed by the two-tailed *t* test with Bonferroni's multiple comparisons correction using the InStat program (GraphPad). Differences of means were considered significant at a significance level of 0.05 (\*,  $P < 0.05$ ; \*\*,  $P < 0.01$ ; \*\*\*,  $P < 0.001$ ).

1. Arena S, et al. (2007) Knock-in of oncogenic kras does not transform mouse somatic cells but triggers a transcriptional response that classifies human cancers. *Cancer Res* 67:8468–8476.

2. Bardelli A, et al. (1999) Concomitant activation of pathways downstream of Grb2 and PI 3-kinase is required for MET-mediated metastasis. *Oncogene* 18:1139–1146.

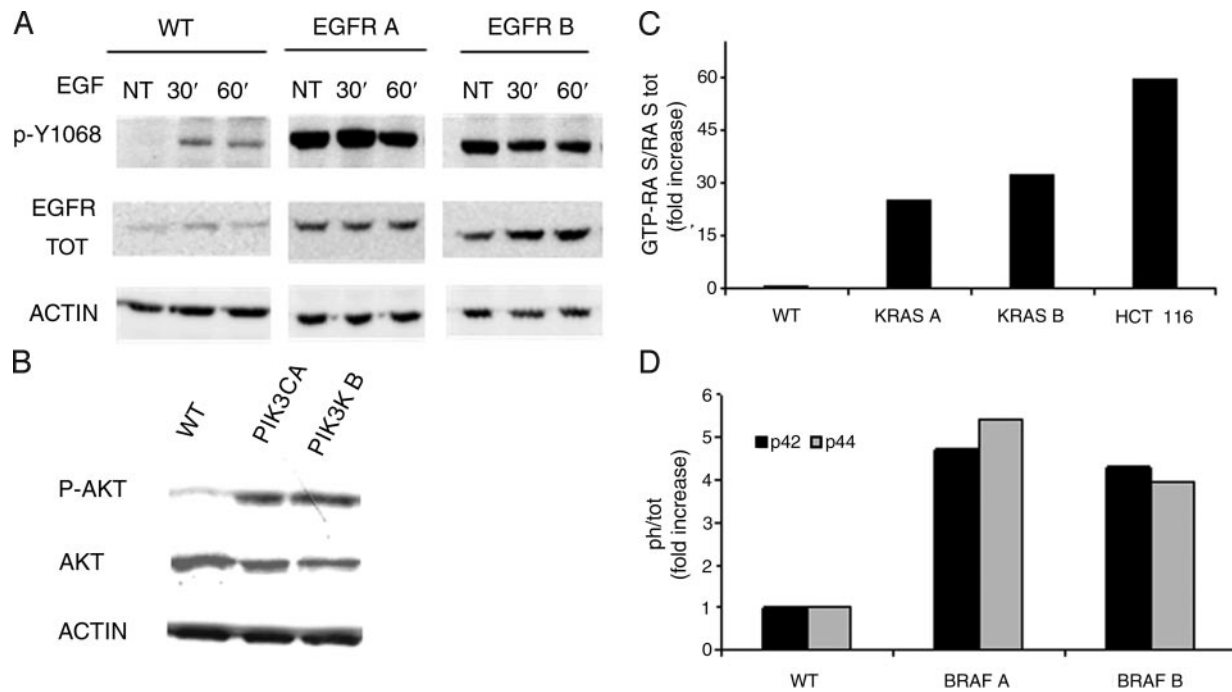

**Fig. S1.** Biochemical analysis of hTERT-HME1 KI cells carrying oncogenic alleles. (A) After starvation, *EGFR* mutated clones (A and B) and parental (WT) cells were treated with EGF (50 ng/ml) for the indicated times. Lysates were immunoblotted with anti-phospho-EGFR (Tyr-1068) and total anti-EGFR, and total protein amount was determined with anti-actin antibody. (B) Activation of PI3K in serum starved *PIK3CA* (H1047R) KI and WT cells was measured by anti-phosphoAKT antibody. Lysates were immunoblotted also with anti-total AKT, and total protein amount was determined with anti-actin antibody. (C) *KRAS* mutated clones (A and B) and parental (WT) cells were serum-starved for 48 h and lysed. Levels of GTP-RAS were assessed by pull down with the recombinant RAF-CRIB domain and immunoblotting with anti-Pan-Ras (Ab-3) antibody. Total lysates were also immunoblotted with anti-Pan-Ras and anti-actin antibody. The colorectal cancer cell line HCT 116 carrying a mutated *KRAS* D13 allele served as control. The columns represent the result of the densitometric analysis of the dot images corresponding to the GTP-RAS normalized on total RAS of the indicated cell lines. The numbers are referred to the untreated WT cells that were given an arbitrary value of 1. (D) WT and *BRAF* KI cells were grown in growth factor-deprived medium, and the corresponding lysates were immunoblotted with the anti-Phospho-p44/42 Map kinase(Thr202/Tyr204), total MAPK1/MAPK2, and anti-actin antibodies. The columns represent the result of the densitometric analysis of the dot images corresponding to the phosphorylation status of MAPK normalized on total MAPK. The numbers are referred to the untreated WT cells that were given an arbitrary value of 1.

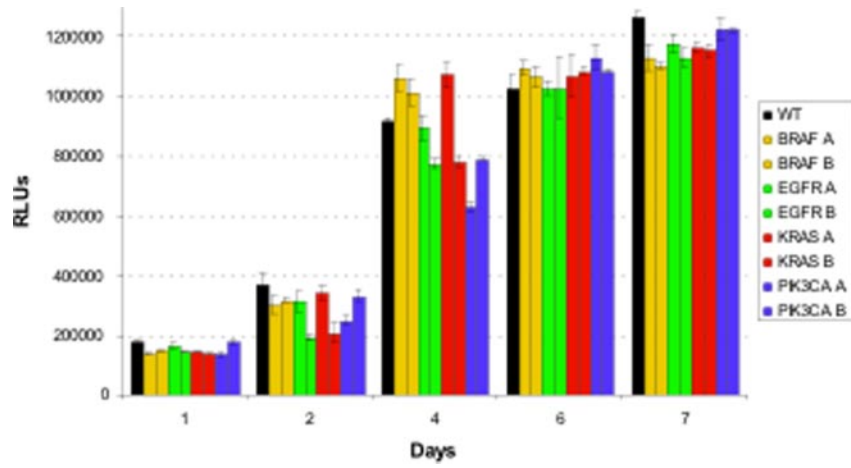

**Fig. S2.** Growth curves of mutated cells carrying oncogenic alleles. Cellular proliferation of hTERT-HME1 KI clones in 96-well plastic culture plates was assessed using media containing EGF, insulin, hydrocortisone and 5% FBS. Average cell number at each timepoint was estimated by determining ATP content in quadruplicate wells. Data are represented as mean  $\pm$  SD of three independent experiments. RLU's, relative light units.

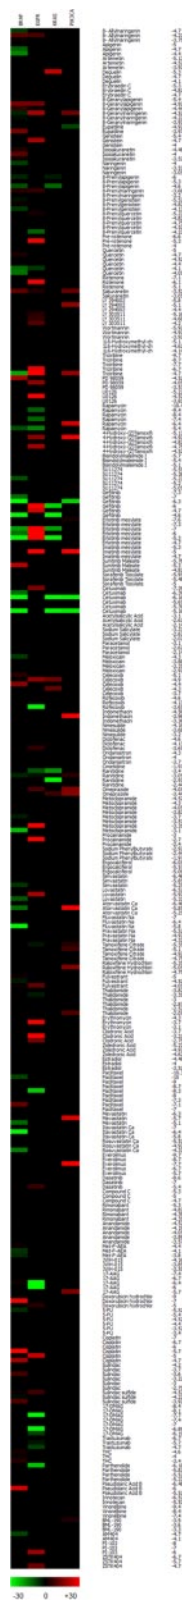

**Fig. S3.** Graphical visualization using GEDAS of the differential pharmacological responses of KI cells to drugs. Compounds that preferentially inhibit the growth of mutated cells are highlighted by the red color, while green indicates compounds to which KI cells are more resistant than the WT counterpart. Black boxes indicate no significant differences in response between KI and parental cells. The cell genotype, the drug names, and the logarithmic concentration at which compounds were tested are indicated.

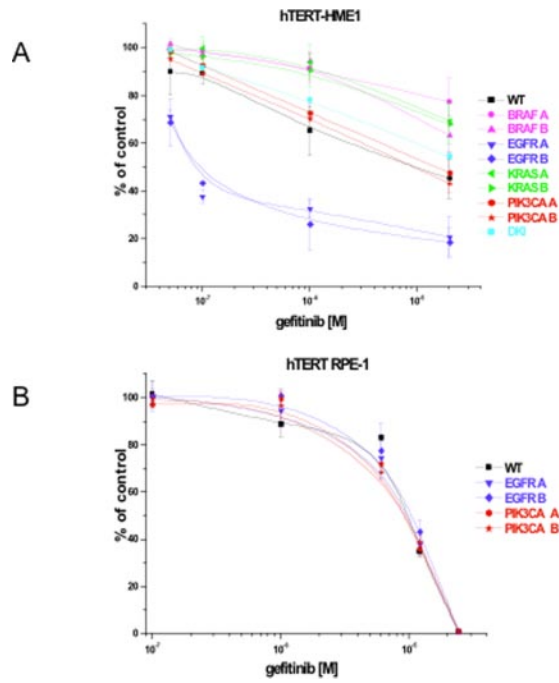

**Fig. S4.** Effect of the *EGFR* tyrosine kinase inhibitor gefitinib on KI cells. The effect of gefitinib treatment for 96 h on cell viability was assessed for hTERT-HME1 (A) and hTERT RPE-1 (B) isogenic clones. The average cell number at each indicated drug concentration was measured by determining ATP content in three replicate wells. Results are normalized to cell growth treated with corresponding amounts of DMSO and are represented as mean  $\pm$  SD of at least three independent experiments.

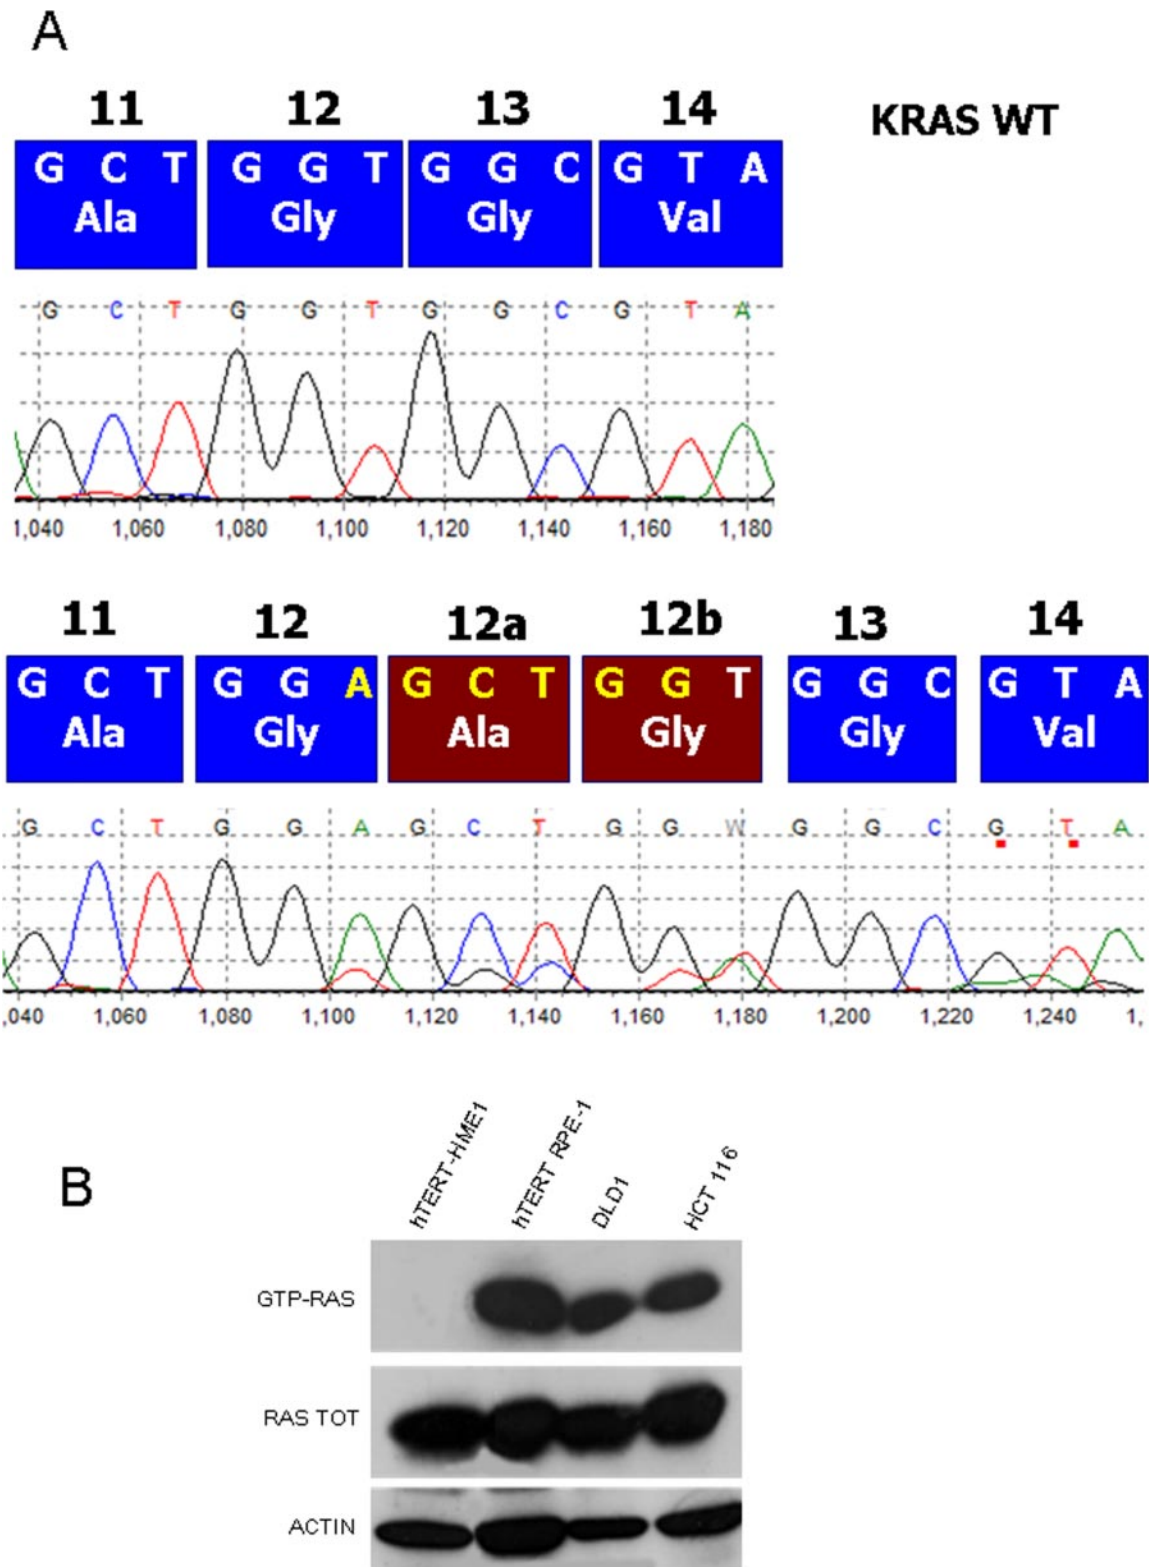

**Fig. S5.** hTERT RPE1 cells carry a KRAS-activating mutation. (A) Electropherograms showing the WT and mutated (Gly-12 insAla-Gly) KRAS alleles in hTERT RPE-1 cells. (B) Levels of GTP-Ras were assessed in hTERT RPE-1 cells by pull down with the recombinant RAF-CRIB domain and immunoblotting with anti-Pan-Ras (Ab-3) antibody. The colorectal cancer cell lines HCT-116 and DLD1 carrying a mutated *KRAS* D13 allele were used as positive controls, while hTERT-HME1 cells represented negative control. Total lysates were also immunoblotted with anti-Pan-Ras and anti-actin antibody.

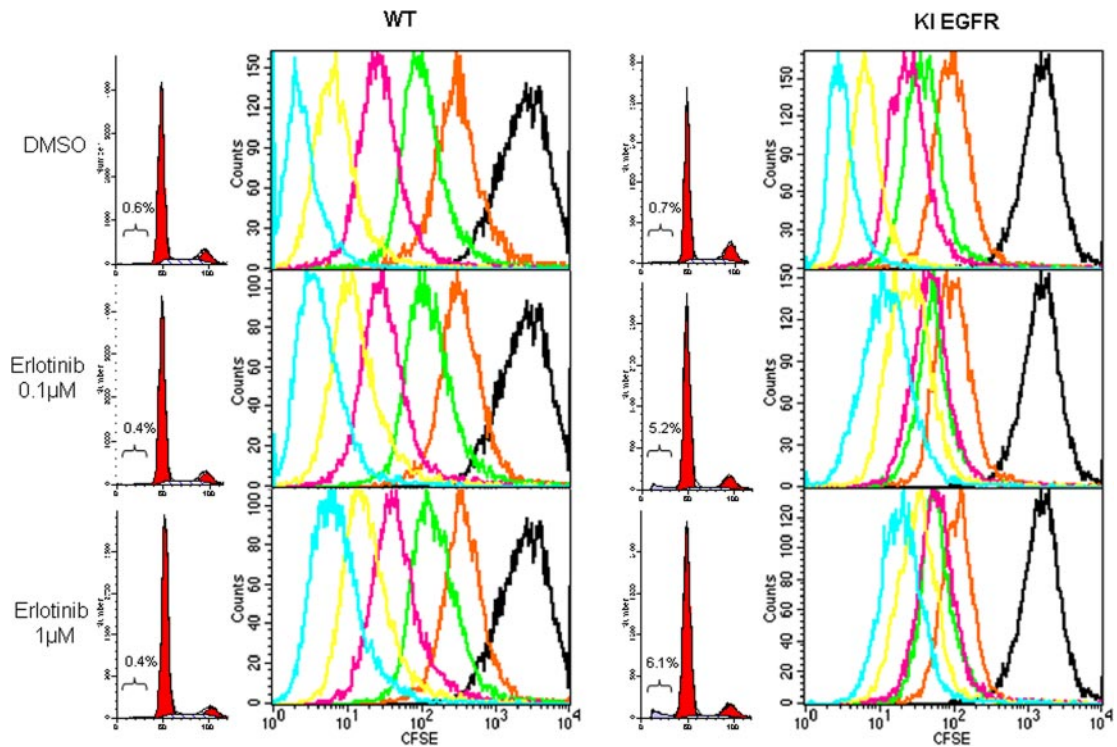

**Fig. S6.** Effect of erlotinib on cell cycle and proliferation of WT and *EGFR* mutant cells. CFSE-labeled cells were analyzed by flow cytometry at the indicated time-points. The maximum fluorescence intensity for all samples was recorded at day 0. Decrease of fluorescence intensity is proportional to the number of cell divisions. hTERT-HME1 WT and *EGFR* KI cells showed a similar pattern of proliferation in absence of treatment. Exposure to the indicated concentrations of erlotinib minimally affected the number of WT cell doublings over a period of 7 days. Erlotinib arrested hTERT-HME1 *EGFR* KI clones in the G<sub>0</sub>/G<sub>1</sub>-phase of the cell cycle, as shown by the decrease in the proportions of cells in the S- and G<sub>2</sub>/M-phases. After treatment, a small but significant fraction of subG<sub>1</sub> apoptotic cells was noted only in *EGFR* KI cells and not in the parental population.



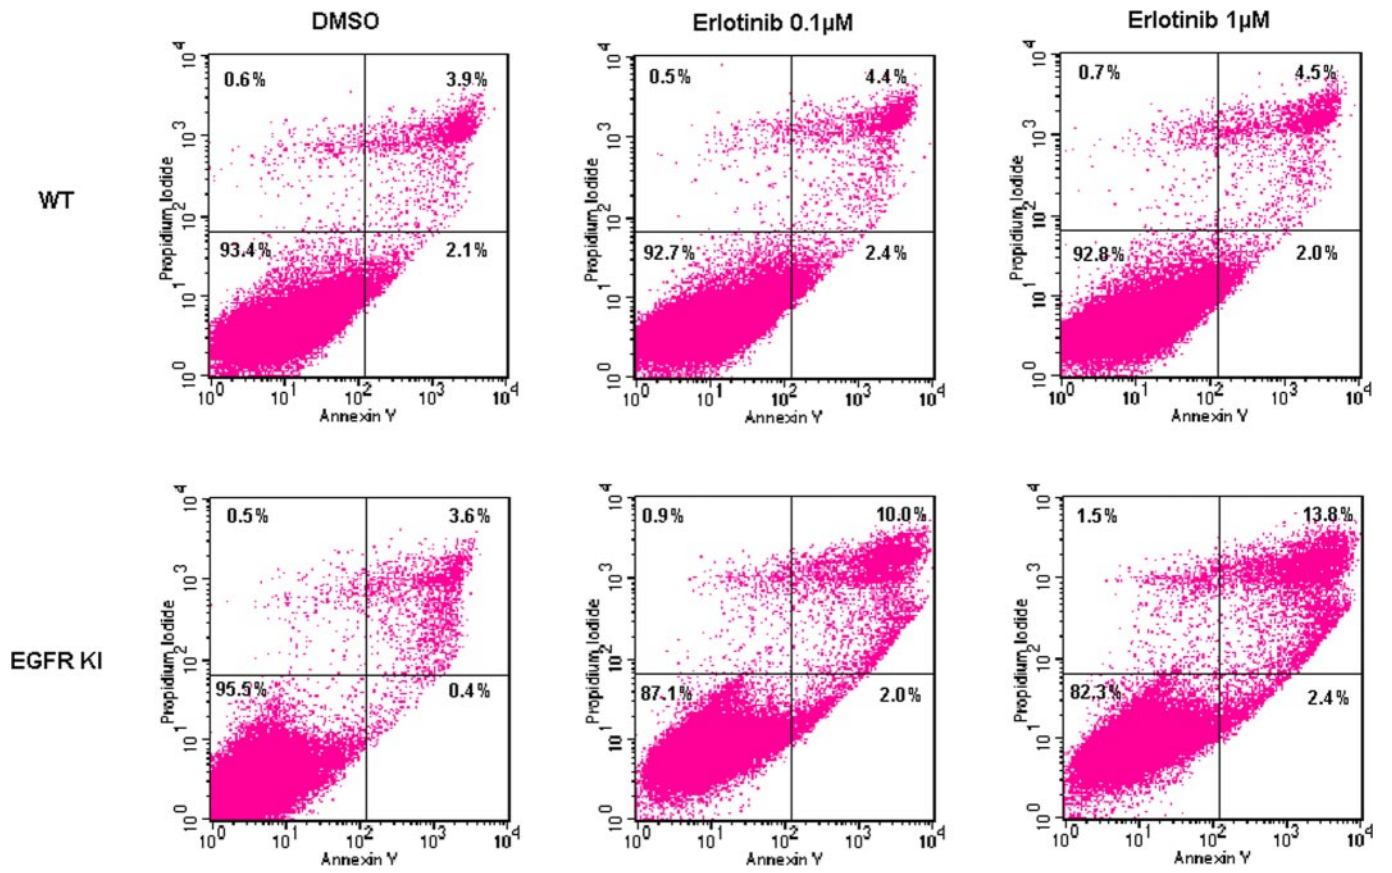

Fig. S7. Effect of erlotinib on apoptosis of wt and *EGFR* mutant cells. After 7 days' exposure to the drug, cells were collected, stained with annexin V-Alexa-488 and propidium iodide, and analyzed by flow cytometry. The percentages of cells in each quadrant are shown.

Table S1. List of drug concentrations that were tested on KI cells

| OGC ID  | Compound                                                                                                                                           | Company           | Catalog number | Drug concentration, log[M] |       |
|---------|----------------------------------------------------------------------------------------------------------------------------------------------------|-------------------|----------------|----------------------------|-------|
|         |                                                                                                                                                    |                   |                | Min                        | Max   |
| OGC-001 | 8-Allylnaringenin                                                                                                                                  | CS                |                | -4.95                      | -3.74 |
| OGC-002 | Apigenin                                                                                                                                           | CS                |                | -5.48                      | -4.52 |
| OGC-003 | Artemetin                                                                                                                                          | CS                |                | -5.12                      | -3.92 |
| OGC-004 | Degueline                                                                                                                                          | CS                |                | -7.40                      | -4.10 |
| OGC-005 | Erybraedin C                                                                                                                                       | CS                |                | -5.30                      | -4.70 |
| OGC-006 | 8-Geranylapiogenin                                                                                                                                 | CS                |                | -5.40                      | -4.44 |
| OGC-007 | 8-Geranylnaringenin                                                                                                                                | CS                |                | -5.30                      | 3.44  |
| OGC-008 | Eupatiline                                                                                                                                         | CS                |                | -5.30                      | -3.97 |
| OGC-009 | Genistein                                                                                                                                          | CS                |                | -5.30                      | -4.10 |
| OGC-010 | Isosakuranetin                                                                                                                                     | CS                |                | -5.00                      | -3.52 |
| OGC-011 | Naringenin                                                                                                                                         | CS                |                | -4.22                      | -3.05 |
| OGC-012 | 8-Prenylapigenin                                                                                                                                   | CS                |                | -6.00                      | -3.74 |
| OGC-013 | 8-Prenylnaringenin                                                                                                                                 | CS                |                | -4.52                      | -3.05 |
| OGC-014 | 8-Prenylgenistein                                                                                                                                  | CS                |                | -5.52                      | -4.12 |
| OGC-015 | 8-Prenylquercetin                                                                                                                                  | CS                |                | -5.48                      | -4.14 |
| OGC-016 | Pre-rotenone                                                                                                                                       | CS                |                | -6.30                      | -4.30 |
| OGC-017 | Quercetin                                                                                                                                          | CS                |                | -5.00                      | -3.92 |
| OGC-018 | Rotenone                                                                                                                                           | CS                |                | -7.10                      | -5.00 |
| OGC-019 | Sakuranetin                                                                                                                                        | CS                |                | -4.52                      | -3.57 |
| OGC-020 | LY 294002                                                                                                                                          | Calbiochem        | 440202         | -5.80                      | -4.40 |
| OGC-021 | LY 303511                                                                                                                                          | Alexis            | ALX-270-410    | -5.22                      | -4.05 |
| OGC-022 | Wortmannin                                                                                                                                         | Alexis            | ALX-350-020    | -5.10                      | -3.70 |
| OGC-023 | 1 <i>L</i> -6-Hydroxymethyl- <i>chiro</i> -inositol-2-<br>( <i>R</i> )-2- <i>O</i> -methyl-3- <i>O</i> -octadecyl- <i>sn</i> -<br>glycerocarbonate | Alexis            | ALX-270-292    | -5.00                      | -4.05 |
| OGC-024 | Triciribine. Akt Inhibitor V                                                                                                                       | Calbiochem        | 124005         | -8.70                      | -4.70 |
| OGC-025 | PD 98059                                                                                                                                           | Calbiochem        | 513001         | -4.52                      | -3.57 |
| OGC-026 | U0126                                                                                                                                              | Promega           | V1121          | -5.22                      | -3.60 |
| OGC-027 | Rapamycin                                                                                                                                          | Alexis            | ALX-380-004    | -11.00                     | -6.00 |
| OGC-028 | 4-Hydroxy-( <i>Z</i> )tamoxifen                                                                                                                    | Calbiochem        | 579002         | -5.12                      | -4.52 |
| OGC-029 | Bisindolylmaleimide I                                                                                                                              | Alexis            | ALX-270-049    | -5.70                      | -4.70 |
| OGC-030 | SU11274                                                                                                                                            | Calbiochem        | 448101         | -5.55                      | -5.20 |
| OGC-031 | Gefitinib                                                                                                                                          | SRP               | SRP01240 g     | -7.30                      | -4.44 |
| OGC-032 | Erlotinib mesylate                                                                                                                                 | SRP               | SRP01330e      | -7.30                      | -4.40 |
| OGC-033 | Imatinib mesylate                                                                                                                                  | SRP               | SRP00530i      | -5.52                      | -4.44 |
| OGC-034 | Sunitinib maleate                                                                                                                                  | SRP               | SRP01785 s     | -5.78                      | -4.74 |
| OGC-035 | Sorafenib tosylate                                                                                                                                 | SRP               | SRP01590 s     | -5.95                      | -5.00 |
| OGC-036 | Cetuximab                                                                                                                                          | Hospital Pharmacy |                | -7.65                      | -5.39 |
| OGC-037 | Acetylsalicylic acid                                                                                                                               | Sigma-Aldrich     | 239631         | -3.10                      | -2.14 |
| OGC-038 | Sodium salicylate                                                                                                                                  | Sigma-Aldrich     | 241350         | -4.00                      | -1.87 |
| OGC-039 | Mesalazine                                                                                                                                         | Sigma-Aldrich     | A3537          | -3.65                      | -1.27 |
| OGC-040 | Paracetamol                                                                                                                                        | Sigma-Aldrich     | A5000          | -3.52                      | -2.14 |
| OGC-041 | Meloxicam                                                                                                                                          | Hospital Pharmacy |                | -4.40                      | -3.05 |
| OGC-042 | Celecoxib                                                                                                                                          | Hospital Pharmacy |                | -5.10                      | -3.35 |
| OGC-043 | Rofecoxib                                                                                                                                          | SRP               | SRP013045r     | -4.60                      | -3.27 |
| OGC-045 | Indomethacin                                                                                                                                       | Hospital Pharmacy |                | -4.70                      | -3.40 |
| OGC-046 | Nimesulide                                                                                                                                         | Sigma-Aldrich     | N1016          | -4.30                      | -3.22 |
| OGC-047 | Diclofenac                                                                                                                                         | Hospital Pharmacy |                | -4.70                      | -3.74 |
| OGC-048 | Ondansetron                                                                                                                                        | Hospital Pharmacy |                | -4.30                      | -3.70 |
| OGC-049 | Cimetidine                                                                                                                                         | Hospital Pharmacy |                | -3.22                      | -1.97 |
| OGC-050 | Ranitidine                                                                                                                                         | Hospital Pharmacy |                | -3.40                      | -2.44 |
| OGC-051 | Omeprazole                                                                                                                                         | Hospital Pharmacy |                | -4.40                      | -3.40 |
| OGC-052 | Metoclopramide                                                                                                                                     | Hospital Pharmacy |                | -4.52                      | -3.57 |
| OGC-053 | Procainamide                                                                                                                                       | Sigma-Aldrich     | P9391          | -3.40                      | -2.40 |
| OGC-054 | Sodium phenylbutyrate                                                                                                                              | Calbiochem        | 567616         | -3.52                      | -1.97 |
| OGC-055 | Ergocalciferol                                                                                                                                     | Hospital Pharmacy |                | -6.05                      | -5.09 |
| OGC-056 | Calcitriol                                                                                                                                         | Hospital Pharmacy |                | -5.40                      | -3.74 |
| OGC-057 | Simvastatin                                                                                                                                        | SRP               | SRPO1380 s     | -6.48                      | -5.49 |
| OGC-058 | Lovastatin                                                                                                                                         | SRP               | SRPO1585I      | -6.52                      | -5.27 |
| OGC-059 | Atorvastatin Ca                                                                                                                                    | SRP               | SRPO7330a      | -6.52                      | -5.27 |
| OGC-060 | Fluvastatin Na                                                                                                                                     | SRP               | SRPO1980f      | -7.12                      | -5.57 |
| OGC-061 | Pravastatin Na                                                                                                                                     | SRP               | SRPO2590p      | -5.52                      | -4.27 |

| OGC ID  | Compound                  | Company           | Catalog number | Drug concentration,<br>log[M] |       |
|---------|---------------------------|-------------------|----------------|-------------------------------|-------|
|         |                           |                   |                | Min                           | Max   |
| OGC-062 | Tamoxifene citrate        | Calbiochem        | 579000         | -5.70                         | -4.74 |
| OGC-063 | Raloxifene hydrochloride  | Sigma-Aldrich     | R1402          | -5.70                         | -4.74 |
| OGC-064 | Fulvestrant               | Hospital Pharmacy |                | -5.00                         | -4.05 |
| OGC-066 | Erythromycin              | Sigma-Aldrich     | 45673-5G-F     | -4.30                         | -3.10 |
| OGC-067 | Clodronic acid            | Hospital Pharmacy |                | -3.70                         | -2.44 |
| OGC-068 | Zoledronic Acid           | Hospital Pharmacy |                | -5.70                         | -4.70 |
| OGC-069 | Estradiol                 | Hospital Pharmacy |                | -4.48                         | -3.52 |
| OGC-070 | Paclitaxel                | Hospital Pharmacy |                | -10.70                        | -7.00 |
| OGC-071 | Mevastatin                | SRP               | SRPO6551m      | -6.60                         | -5.05 |
| OGC-072 | Itavastatin Ca            | SRP               | SRPO2390i      | -7.60                         | -5.74 |
| OGC-073 | Rosuvastatin Ca           | SRP               | SRPO1326r      | -5.52                         | -4.27 |
| OGC-074 | Everolimus                | Sigma-Aldrich     | 7741           | -9.30                         | -4.70 |
| OGC-075 | Dasatinib monohydrate     | SRP               | SRP09030d      | -8.60                         | -5.40 |
| OGC-076 | Compound C                | Sigma-Aldrich     | P5499          | -5.70                         | -4.49 |
| OGC-077 | Rimonabant                | SRP               | SRP01287r      | -5.30                         | -4.22 |
| OGC-078 | Anandamide                | Cayman            | CAY-90050      | -4.70                         | -3.57 |
| OGC-079 | Met-F-AEA                 | Cayman            | CAY-90055      | -4.70                         | -3.74 |
| OGC-080 | JWH-015                   | Cayman            | CAY-10009018   | -4.70                         | -3.55 |
| OGC-081 | 17-Allylaminogeldanamycin | Alexis            | ALX380-091     | -7.70                         | -6.00 |
| OGC-082 | Doxorubicin hydrochloride | Hospital Pharmacy |                | -9.00                         | -5.00 |
| OGC-083 | 5-Fluorouracil            | Hospital Pharmacy |                | -5.82                         | -3.52 |
| OGC-084 | Cisplatin                 | Hospital Pharmacy |                | -6.70                         | -4.30 |
| OGC-085 | Sulindac                  | Cayman            | CAY-10004386   | -4.20                         | -3.00 |
| OGC-086 | Sulindac sulfide          | Alexis            | ALX-430-106    | -4.52                         | -3.85 |
| OGC-087 | 17-DMAG                   | Alexis            | ALX380-110     | -8.40                         | -7.00 |
| OGC-088 | Trastuzumab               | Hospital Pharmacy |                | -6.70                         | -4.27 |
| OGC-089 | THC                       | CS                |                | -5.30                         | -3.40 |
| OGC-090 | Parthenolide              | CS                |                | -6.35                         | -5.22 |
| OGC-091 | Pseudolaric acid B        | CS                |                | -6.90                         | -5.70 |
| OGC-092 | Irinotecan                | Hospital Pharmacy |                | -6.52                         | -4.52 |
| OGC-093 | Vinorelbine               | Hospital Pharmacy |                | -9.40                         | -7.30 |
| OGC-095 | IMMA (BML-190)            | Cayman            | CAY-70275      | -4.48                         | -3.30 |
| OGC-096 | AM404                     | Alexis            | ALX-340-032    | -4.70                         | -4.10 |
| OGC-097 | PI-103                    | Cayman            | CAY-10009209   | -8.00                         | -6.00 |
| OGC-098 | ZSTK404                   | Alexis            | ALX-270-454    | -6.70                         | -4.7  |

Drug manufacturers are also listed. CS, custom synthesis; SRP, Sequoia Research Products.

Table S2. Pharmacological responses of hTERT-HME1 knock-in cells carrying oncogenic alleles

| Compound ID | Compound name       | Log[M] | BRAF  | EGFR  | KRAS  | PIK3CA |
|-------------|---------------------|--------|-------|-------|-------|--------|
| OGC-001     | 8-Allylnaringenin   | -4.70  | -1.38 | 0     | 0     | 0      |
| OGC-001     | 8-Allylnaringenin   | -4.22  | 2.08  | 1.68  | 0     | 0      |
| OGC-001     | 8-Allylnaringenin   | -3.75  | 0.28  | 0     | 0     | 0      |
| OGC-002     | Apigenin            | -5.00  | 0     | 0     | 0     | 0      |
| OGC-002     | Apigenin            | -4.70  | -2.32 | 0     | 0     | 0      |
| OGC-002     | Apigenin            | -4.40  | -3.18 | 0     | 0     | 0      |
| OGC-003     | Artemetin           | -5.13  | 0     | 0     | 0     | 0      |
| OGC-003     | Artemetin           | -4.52  | 0     | 0     | 0     | 0      |
| OGC-003     | Artemetin           | -3.92  | 0     | 0     | 0     | 0      |
| OGC-004     | Deguelin            | -5.30  | 0     | 0     | 4.78  | 0      |
| OGC-004     | Deguelin            | -4.70  | 0     | 0     | 0     | 0      |
| OGC-004     | Deguelin            | -4.10  | 0     | 0     | 0     | 0      |
| OGC-005     | Erybraedin C        | -5.30  | 0     | 0     | 0     | 0      |
| OGC-005     | Erybraedin C        | -4.82  | 0     | 0     | 0     | 0      |
| OGC-005     | Erybraedin C        | -4.70  | 0     | 0     | 0     | 0      |
| OGC-006     | 8-Geranylapiogenin  | -5.40  | -0.12 | 0     | 0     | 0      |
| OGC-006     | 8-Geranylapiogenin  | -4.92  | 2.84  | 2.86  | 0     | 0      |
| OGC-006     | 8-Geranylapiogenin  | -4.44  | 1.16  | 0     | 0     | 0      |
| OGC-007     | 8-Geranylnaringenin | -4.52  | -0.84 | 4.16  | 0     | 2.66   |
| OGC-007     | 8-Geranylnaringenin | -4.22  | -0.28 | -0.02 | 0     | 0      |
| OGC-007     | 8-Geranylnaringenin | -3.92  | 0     | 0     | 0     | 0      |
| OGC-008     | Eupatiline          | -4.92  | -0.1  | 0     | 0     | -1.66  |
| OGC-008     | Eupatiline          | -3.97  | 2.9   | 0     | 0     | 0      |
| OGC-009     | Genistein           | -5.40  | 0     | 0     | 0     | 0      |
| OGC-009     | Genistein           | -4.70  | 0     | 3.98  | 0     | 0      |
| OGC-009     | Genistein           | -4.00  | 0     | 0     | 0     | 0      |
| OGC-010     | Isosakuranetin      | -4.48  | 0.7   | 0     | 0     | 0      |
| OGC-010     | Isosakuranetin      | -4.00  | 2.26  | 0     | 0     | 0      |
| OGC-010     | Isosakuranetin      | -3.52  | 0.44  | 0     | 0     | 0      |
| OGC-011     | Naringenin          | -4.00  | -1.5  | 0     | 0     | 0      |
| OGC-011     | Naringenin          | -3.52  | 0     | 0     | 0     | 0      |
| OGC-011     | Naringenin          | -3.05  | -0.08 | 0     | 0     | 0      |
| OGC-012     | 8-Prenylapiogenin   | -6.00  | -0.88 | 0     | -0.68 | 0      |
| OGC-012     | 8-Prenylapiogenin   | -5.30  | 0.12  | 0     | 0     | 0      |
| OGC-012     | 8-Prenylapiogenin   | -4.60  | -1.9  | 0     | -2.52 | 0      |
| OGC-013     | 8-Prenylnaringenin  | -3.68  | 0.88  | 1.16  | 0     | 0      |
| OGC-013     | 8-Prenylnaringenin  | -3.20  | 0.02  | 0     | 0.02  | 0.02   |
| OGC-014     | 8-Prenylgenistein   | -5.52  | -0.38 | 0     | 0     | 0      |
| OGC-014     | 8-Prenylgenistein   | -4.82  | 0.32  | 0     | 0     | 0      |
| OGC-014     | 8-Prenylgenistein   | -4.13  | -1.34 | 0     | 0     | 0      |
| OGC-015     | 8-Prenylquercetin   | -5.22  | 0     | 0.54  | 0     | 0      |
| OGC-015     | 8-Prenylquercetin   | -4.82  | 0     | 0     | 0     | 0      |
| OGC-015     | 8-Prenylquercetin   | -4.75  | 0     | 0     | 0     | 0      |
| OGC-015     | 8-Prenylquercetin   | -4.52  | 0     | 0     | 0     | 0      |
| OGC-015     | 8-Prenylquercetin   | -4.22  | 0     | -2.34 | 0     | 0      |
| OGC-016     | Pre-rotenone        | -6.60  | 0     | 0     | 0     | 0      |
| OGC-016     | Pre-rotenone        | -5.30  | 0     | 6.74  | 0     | 0      |
| OGC-016     | Pre-rotenone        | -4.00  | 0     | 0     | 0     | 0      |
| OGC-017     | Quercetin           | -5.00  | 0     | 0     | 0     | 0      |
| OGC-017     | Quercetin           | -4.70  | 0.64  | 0     | 0     | 0      |
| OGC-017     | Quercetin           | -4.52  | 0     | 0     | 0     | 0      |
| OGC-017     | Quercetin           | -4.40  | 0     | 0     | 0     | 0      |
| OGC-017     | Quercetin           | -4.10  | -2.52 | -1.36 | 0     | 0      |
| OGC-017     | Quercetin           | -4.05  | -2.76 | 0     | 0     | 0      |
| OGC-018     | Rotenone            | -7.10  | 0     | 0     | 0     | 0      |
| OGC-018     | Rotenone            | -6.10  | 0     | 7.32  | 0     | 0      |
| OGC-018     | Rotenone            | -5.10  | 0     | 0     | 0     | 0      |
| OGC-019     | Sakuranetin         | -3.52  | 2.24  | 0.78  | 0     | 2.4    |
| OGC-019     | Sakuranetin         | -3.05  | 0.02  | 0.02  | 0     | 0      |
| OGC-020     | LY 294002           | -5.80  | 0     | 0     | 0     | 0      |
| OGC-020     | LY 294002           | -5.10  | 0     | 0     | 0     | 3.62   |
| OGC-020     | LY 294002           | -4.40  | 0     | 0     | 0     | 0      |
| OGC-021     | LY 303511           | -5.16  | 0     | 0.86  | 0     | 0      |
| OGC-021     | LY 303511           | -4.68  | 0     | 1.1   | 0     | 0      |

| Compound ID | Compound name                                                                                                                     | Log[M] | BRAF     | EGFR     | KRAS  | PIK3CA |
|-------------|-----------------------------------------------------------------------------------------------------------------------------------|--------|----------|----------|-------|--------|
| OGC-021     | LY 303511                                                                                                                         | -4.20  | 0        | 2.000002 | 0     | 0      |
| OGC-022     | Wortmannin                                                                                                                        | -5.92  | 0        | 0        | 0     | 0      |
| OGC-022     | Wortmannin                                                                                                                        | -4.92  | 0        | 0        | 0     | 0      |
| OGC-022     | Wortmannin                                                                                                                        | -3.92  | 0        | 0        | 0     | 0      |
| OGC-023     | 1L-6-Hydroxymethyl- <i>chiro</i> -inositol-2-( <i>R</i> )-2- <i>O</i> -methyl-3- <i>O</i> -octadecyl- <i>sn</i> -glycerocarbonate | -5.10  | 0        | 0        | 0     | 0      |
| OGC-023     | 1L-6-Hydroxymethyl- <i>chiro</i> -inositol-2-( <i>R</i> )-2- <i>O</i> -methyl-3- <i>O</i> -octadecyl- <i>sn</i> -glycerocarbonate | -4.62  | 0        | 0        | 0     | 0      |
| OGC-023     | 1L-6-Hydroxymethyl- <i>chiro</i> -inositol-2-( <i>R</i> )-2- <i>O</i> -methyl-3- <i>O</i> -octadecyl- <i>sn</i> -glycerocarbonate | -4.14  | 0        | 0        | 0     | 0      |
| OGC-024     | Triciribine                                                                                                                       | -9.70  | 0        | 0        | 0     | 0      |
| OGC-024     | Triciribine                                                                                                                       | -8.70  | 0        | 0        | 0     | 0      |
| OGC-024     | Triciribine                                                                                                                       | -7.70  | 0        | 0        | 0     | 0      |
| OGC-024     | Triciribine                                                                                                                       | -6.70  | 0        | 5.62     | 0     | 0      |
| OGC-024     | Triciribine                                                                                                                       | -4.70  | -3.96    | 9.62     | 0     | 3.54   |
| OGC-025     | PD 98059                                                                                                                          | -4.52  | 4.000002 | 0        | 0     | 0      |
| OGC-025     | PD 98059                                                                                                                          | -4.05  | 0        | 3.5      | 0     | 0      |
| OGC-025     | PD 98059                                                                                                                          | -3.57  | 0        | 0        | 0     | 0      |
| OGC-026     | U0126                                                                                                                             | -5.22  | 0        | 0        | 0     | 0      |
| OGC-026     | U0126                                                                                                                             | -4.52  | 0        | 6.76     | 0     | 0      |
| OGC-026     | U0126                                                                                                                             | -3.82  | 0        | 0        | 0     | 0      |
| OGC-027     | Rapamycin                                                                                                                         | -10.40 | 0        | 0        | 0     | 0      |
| OGC-027     | Rapamycin                                                                                                                         | -9.40  | 0        | -2.38    | 0     | 0      |
| OGC-027     | Rapamycin                                                                                                                         | -8.40  | 0        | 0        | 0     | 0      |
| OGC-027     | Rapamycin                                                                                                                         | -7.40  | 0        | -2.46    | 0     | 0      |
| OGC-027     | Rapamycin                                                                                                                         | -6.40  | 0        | 0        | 0     | 4.98   |
| OGC-027     | Rapamycin                                                                                                                         | -5.40  | -1.84    | -3.1     | 0     | 0      |
| OGC-028     | 4-Hydroxy-( <i>Z</i> )-tamoxifen                                                                                                  | -5.13  | 0        | 0        | 0     | 0      |
| OGC-028     | 4-Hydroxy-( <i>Z</i> )-tamoxifen                                                                                                  | -4.92  | 0        | 3.36     | 0     | 5.66   |
| OGC-028     | 4-Hydroxy-( <i>Z</i> )-tamoxifen                                                                                                  | -4.82  | 0        | 0        | 0     | 0      |
| OGC-028     | 4-Hydroxy-( <i>Z</i> )-Tamoxifen                                                                                                  | -4.75  | 0        | 3.9      | 0     | 0      |
| OGC-028     | 4-Hydroxy-( <i>Z</i> )-tamoxifen                                                                                                  | -4.52  | 0        | 0        | 0     | 0      |
| OGC-029     | Bisindolylmaleimide I                                                                                                             | -5.70  | 0        | 0        | 0     | 0      |
| OGC-029     | Bisindolylmaleimide I                                                                                                             | -5.40  | 0        | 0        | 0     | 0      |
| OGC-029     | Bisindolylmaleimide I                                                                                                             | -5.10  | 0        | 0        | 0     | 0      |
| OGC-030     | SU11274                                                                                                                           | -5.55  | 0        | 0        | 0     | 0      |
| OGC-030     | SU11274                                                                                                                           | -5.38  | 0        | 0        | 0     | 0      |
| OGC-030     | SU11274                                                                                                                           | -5.22  | -1.88    | 0        | 0     | 0      |
| OGC-030     | SU11274                                                                                                                           | -5.20  | 0        | 0        | 0     | 0      |
| OGC-030     | SU11274                                                                                                                           | -5.05  | 0        | 0        | 0     | 0.18   |
| OGC-031     | Gefitinib                                                                                                                         | -7.30  | 0        | 0        | 0     | 0      |
| OGC-031     | Gefitinib                                                                                                                         | -7.00  | -2.52    | 0        | 0     | 0      |
| OGC-031     | Gefitinib                                                                                                                         | -6.30  | -6.26    | 0        | 0     | -4.92  |
| OGC-031     | Gefitinib                                                                                                                         | -6.00  | 0        | 7.2      | -5.18 | 0      |
| OGC-031     | Gefitinib                                                                                                                         | -4.70  | 0        | 5.08     | 0     | 0      |
| OGC-031     | Gefitinib                                                                                                                         | -4.60  | -7       | 0        | -7.6  | 0      |
| OGC-032     | Erlotinib mesylate                                                                                                                | -7.60  | -0.06    | 0        | 0     | 0.5    |
| OGC-032     | Erlotinib mesylate                                                                                                                | -7.30  | 0        | 0        | 0     | 0      |
| OGC-032     | Erlotinib mesylate                                                                                                                | -7.00  | -3.72    | 8        | -3.85 | 0      |
| OGC-032     | Erlotinib mesylate                                                                                                                | -6.00  | -2.66    | 6.88     | 0     | 0      |
| OGC-032     | Erlotinib mesylate                                                                                                                | -5.30  | -6.89    | 5.88     | -5.93 | 0      |
| OGC-032     | Erlotinib mesylate                                                                                                                | -4.70  | 0        | 0        | 0     | 0      |
| OGC-033     | Imatinib mesylate                                                                                                                 | -5.30  | 0        | 0        | 0     | 0      |
| OGC-033     | Imatinib mesylate                                                                                                                 | -5.00  | 0        | 7.3      | 0     | 9.56   |
| OGC-033     | Imatinib mesylate                                                                                                                 | -4.70  | 0        | 0        | 0     | 0      |
| OGC-034     | Sunitinib maleate                                                                                                                 | -5.78  | 0        | 0        | 0     | 0      |
| OGC-034     | Sunitinib maleate                                                                                                                 | -5.30  | 4.42     | 0        | 0     | 0      |
| OGC-034     | Sunitinib maleate                                                                                                                 | -4.82  | 0        | 0        | 0     | 0      |
| OGC-035     | Sorafenib tosylate                                                                                                                | -5.95  | 0        | 0        | 0     | 0      |
| OGC-035     | Sorafenib tosylate                                                                                                                | -5.48  | 0        | 0        | 0     | 0      |
| OGC-035     | Sorafenib tosylate                                                                                                                | -5.00  | 0        | 0        | 0     | 0      |
| OGC-036     | Cetuximab                                                                                                                         | -7.39  | 0        | 3.08     | 0     | 0      |

| Compound ID | Compound name         | Log[M] | BRAF  | EGFR  | KRAS  | PIK3CA |
|-------------|-----------------------|--------|-------|-------|-------|--------|
| OGC-036     | Cetuximab             | -6.39  | -2.5  | 0     | 0     | 0      |
| OGC-036     | Cetuximab             | -6.16  | -8.6  | 0     | -8.02 | -5.72  |
| OGC-036     | Cetuximab             | -5.65  | 0     | 0     | 0     | 0      |
| OGC-036     | Cetuximab             | -5.39  | 0     | 0     | 0     | 0      |
| OGC-036     | Cetuximab             | -5.16  | -8.68 | 0     | -8.74 | -5.7   |
| OGC-037     | Acetylsalicylic acid  | -3.10  | 0     | 0     | 0     | 0      |
| OGC-037     | Acetylsalicylic acid  | -2.62  | 0     | 0     | 0     | 0      |
| OGC-037     | Acetylsalicylic acid  | -2.14  | 0     | 0     | 0     | 0      |
| OGC-038     | Sodium salicylate     | -3.22  | 0     | 0     | 0     | 0      |
| OGC-038     | Sodium salicylate     | -2.62  | 0     | 0     | 0     | 0      |
| OGC-038     | Sodium salicylate     | -2.02  | 0     | 0     | 0     | 0      |
| OGC-040     | Paracetamol           | -3.10  | 0     | 0     | 0     | 0      |
| OGC-040     | Paracetamol           | -2.62  | 0     | 0     | 0     | 0      |
| OGC-040     | Paracetamol           | -2.14  | 0     | 0     | 0     | 0      |
| OGC-041     | Meloxicam             | -4.30  | -1.38 | 0     | 0     | 0      |
| OGC-041     | Meloxicam             | -3.88  | 0     | 0     | 0     | 0      |
| OGC-041     | Meloxicam             | -3.35  | 0     | 0     | 0     | 0      |
| OGC-041     | Meloxicam             | -2.92  | 0     | 0     | 0     | 0      |
| OGC-042     | Celecoxib             | -5.10  | 0.94  | 0     | 0     | 0      |
| OGC-042     | Celecoxib             | -4.90  | 0     | 3.4   | 2.68  | 0      |
| OGC-042     | Celecoxib             | -4.40  | 3.42  | 0     | 0     | 0      |
| OGC-042     | Celecoxib             | -4.30  | 0     | 0     | 2.5   | 0      |
| OGC-042     | Celecoxib             | -3.70  | 0     | 0     | 0     | 0      |
| OGC-043     | Rofecoxib             | -4.60  | 0     | 0     | 0     | 0      |
| OGC-043     | Rofecoxib             | -4.13  | 0     | 0     | 0     | 0      |
| OGC-043     | Rofecoxib             | -3.65  | 0     | -6.98 | 0     | 0      |
| OGC-045     | Indomethacin          | -4.56  | 0     | 0     | 0     | 0      |
| OGC-045     | Indomethacin          | -3.96  | 0     | 0     | 0     | 10.06  |
| OGC-045     | Indomethacin          | -3.36  | 0     | 0     | 0     | 0      |
| OGC-046     | Nimesulide            | -4.16  | 0     | 0     | 0     | 0      |
| OGC-046     | Nimesulide            | -3.68  | 0     | 0     | 0     | 0      |
| OGC-046     | Nimesulide            | -3.20  | 0     | 0     | 0     | 0      |
| OGC-047     | Diclofenac            | -4.60  | 0     | 0     | 0     | 0      |
| OGC-047     | Diclofenac            | -4.13  | 0     | 0     | 0     | 0      |
| OGC-047     | Diclofenac            | -3.65  | 0     | 1.12  | 0     | 0      |
| OGC-048     | Ondansetron           | -4.30  | 0     | 0     | 0     | 0      |
| OGC-048     | Ondansetron           | -4.00  | 0     | 0     | 0     | 0      |
| OGC-048     | Ondansetron           | -3.70  | 0     | 0     | 0     | 0      |
| OGC-049     | Cimetidine            | -1.97  | 0     | 0     | 0     | 0      |
| OGC-050     | Ranitidine            | -3.40  | 0     | -2.08 | -3.68 | 0      |
| OGC-050     | Ranitidine            | -3.05  | -0.88 | -0.38 | 0     | 0.96   |
| OGC-050     | Ranitidine            | -2.92  | 0     | 0     | -7.44 | 0      |
| OGC-050     | Ranitidine            | -2.44  | 0     | 0     | -0.12 | 0      |
| OGC-051     | Omeprazole            | -4.05  | 0     | 1.74  | 0     | 2.98   |
| OGC-051     | Omeprazole            | -3.44  | 0     | 0     | 1.46  | 3.28   |
| OGC-052     | Metoclopramide        | -4.52  | 0     | 0     | 0     | 0      |
| OGC-052     | Metoclopramide        | -4.30  | 0     | 0     | 0     | 0      |
| OGC-052     | Metoclopramide        | -4.05  | 0     | 0     | 0     | 0      |
| OGC-052     | Metoclopramide        | -3.82  | 0     | 0     | 0     | 0      |
| OGC-052     | Metoclopramide        | -3.70  | -0.66 | 0     | 0     | 0      |
| OGC-052     | Metoclopramide        | -3.57  | 0     | 0     | 0     | 0      |
| OGC-052     | Metoclopramide        | -3.35  | 0     | 9.94  | 0     | 0      |
| OGC-052     | Metoclopramide        | -3.10  | -4.48 | 0     | 0     | 0      |
| OGC-053     | Procainamide          | -3.00  | 0     | 0     | 0     | 0      |
| OGC-053     | Procainamide          | -2.70  | 0     | 14.12 | 0     | 0      |
| OGC-053     | Procainamide          | -2.40  | 0     | 0     | 0     | 0      |
| OGC-054     | Sodium phenylbutyrate | -2.92  | 0     | 0     | 0     | 0      |
| OGC-054     | Sodium phenylbutyrate | -2.44  | 0     | 0     | 0     | 0      |
| OGC-054     | Sodium phenylbutyrate | -1.97  | 0     | 0     | 0     | 0      |
| OGC-055     | Ergocalciferol        | -6.05  | 0     | 0     | 0     | 0      |
| OGC-055     | Ergocalciferol        | -5.57  | 0     | 0     | 0     | 0      |
| OGC-055     | Ergocalciferol        | -5.09  | 0     | 0     | 0     | 0      |
| OGC-057     | Simvastatin           | -6.46  | 0     | 0     | 0     | 0      |
| OGC-057     | Simvastatin           | -5.85  | 0     | 0     | 0     | 0      |
| OGC-057     | Simvastatin           | -5.25  | -1.26 | 0     | 0     | 0      |

| Compound ID | Compound name            | Log[M] | BRAF  | EGFR  | KRAS | PIK3CA |
|-------------|--------------------------|--------|-------|-------|------|--------|
| OGC-058     | Lovastatin               | -6.52  | 0     | 0     | 0    | 0      |
| OGC-058     | Lovastatin               | -5.92  | 0     | 4.06  | 0    | 0      |
| OGC-058     | Lovastatin               | -5.32  | -2.18 | 0     | 0    | 0      |
| OGC-059     | Atorvastatin Ca          | -6.46  | 0     | 0     | 0    | 0      |
| OGC-059     | Atorvastatin Ca          | -5.85  | -2.6  | 0     | 0    | 9.44   |
| OGC-059     | Atorvastatin Ca          | -5.25  | 0     | 0     | 0    | 0      |
| OGC-060     | Fluvastatin Na           | -7.00  | 0     | 0     | 0    | 0      |
| OGC-060     | Fluvastatin Na           | -6.40  | 0     | 0     | 0    | 0      |
| OGC-060     | Fluvastatin Na           | -5.80  | -6.52 | 0     | 0    | 0      |
| OGC-061     | Pravastatin Na           | -5.52  | 0     | 0     | 0    | 0      |
| OGC-061     | Pravastatin Na           | -4.92  | 0     | 0     | 0    | 0      |
| OGC-061     | Pravastatin Na           | -4.32  | 0     | 0     | 0    | 0      |
| OGC-062     | Tamoxifene citrate       | -5.35  | 0     | -0.54 | 0    | 0.9    |
| OGC-062     | Tamoxifene citrate       | -5.10  | 0     | 0     | 0    | 1.42   |
| OGC-062     | Tamoxifene citrate       | -4.92  | 0     | 0     | 0    | 0      |
| OGC-062     | Tamoxifene citrate       | -4.75  | 0     | 0     | 0    | 0      |
| OGC-063     | Raloxifene hydrochloride | -5.35  | 0     | 0     | 0    | 0      |
| OGC-063     | Raloxifene hydrochloride | -5.05  | 0     | 0     | 0    | 3.2    |
| OGC-063     | Raloxifene hydrochloride | -4.75  | 0     | 0     | 0    | 0      |
| OGC-064     | Fulvestrant              | -5.00  | 0.34  | 0     | 0    | 0      |
| OGC-064     | Fulvestrant              | -4.52  | -0.6  | 0     | 0    | 0      |
| OGC-064     | Fulvestrant              | -4.05  | 0.18  | 2.36  | 0    | 0      |
| OGC-065     | Thalidomide              | -3.82  | 0     | 0     | 0    | 0      |
| OGC-065     | Thalidomide              | -3.35  | 0     | -0.68 | 0    | 0      |
| OGC-065     | Thalidomide              | -3.00  | 0     | 0     | 0    | 0      |
| OGC-065     | Thalidomide              | -2.87  | 0     | 0     | 0    | 0      |
| OGC-065     | Thalidomide              | -2.52  | 0     | 0     | 0    | 0      |
| OGC-065     | Thalidomide              | -2.05  | 0     | 0     | 0    | 1.9    |
| OGC-066     | Erythromycin             | -4.30  | 0     | 0     | 0    | 0      |
| OGC-066     | Erythromycin             | -3.70  | 0     | 6.26  | 0    | 0      |
| OGC-066     | Erythromycin             | -3.10  | 0     | 0     | 0    | 0      |
| OGC-067     | Clodronic acid           | -3.70  | 0     | 0     | 0    | 0      |
| OGC-067     | Clodronic acid           | -3.22  | 0     | 7.96  | 0    | 0      |
| OGC-067     | Clodronic acid           | -2.75  | 0     | 2.86  | 0    | 0      |
| OGC-068     | Zoledronic acid          | -5.22  | 0     | 0     | 0    | 0      |
| OGC-068     | Zoledronic acid          | -4.92  | 0     | 0     | 0    | 0      |
| OGC-068     | Zoledronic acid          | -4.62  | 0     | 0     | 0    | 0      |
| OGC-069     | Estradiol                | -4.48  | 0     | 0     | 0    | 0      |
| OGC-069     | Estradiol                | -4.00  | 0     | 0     | 0    | 0      |
| OGC-069     | Estradiol                | -3.52  | 0     | 0     | 0    | 0      |
| OGC-070     | Paclitaxel               | -10.30 | 0     | 0     | 0    | 0      |
| OGC-070     | Paclitaxel               | -10.00 | -1.6  | 0     | 0    | 0      |
| OGC-070     | Paclitaxel               | -9.00  | 0     | 0     | 0    | 0      |
| OGC-070     | Paclitaxel               | -8.70  | 0     | 0     | 0    | 0      |
| OGC-070     | Paclitaxel               | -8.30  | 0     | -4.98 | 0    | 0      |
| OGC-070     | Paclitaxel               | -8.00  | 0     | 0     | 0    | 0      |
| OGC-070     | Paclitaxel               | -7.30  | 0     | 0     | 0    | 0      |
| OGC-070     | Paclitaxel               | -7.10  | 2.38  | 0     | 0    | 0      |
| OGC-070     | Paclitaxel               | -7.00  | 0     | 0     | 0    | 0      |
| OGC-071     | Mevastatin               | -6.30  | 0     | 0     | 0    | 0      |
| OGC-071     | Mevastatin               | -5.70  | 0     | 0     | 0    | 5.3    |
| OGC-071     | Mevastatin               | -5.10  | -2.5  | 0     | 0    | 0      |
| OGC-072     | Itavastatin Ca           | -7.00  | 0     | 0     | 0    | 0      |
| OGC-072     | Itavastatin Ca           | -6.40  | -7.2  | 0     | 0    | 0      |
| OGC-072     | Itavastatin Ca           | -5.80  | 0     | 0     | 0    | 0      |
| OGC-073     | Rosuvastatin Ca          | -5.52  | 0     | 0     | 0    | 0      |
| OGC-073     | Rosuvastatin Ca          | -4.92  | 0     | 0     | 0    | 0      |
| OGC-073     | Rosuvastatin Ca          | -4.32  | -3    | 0     | 0    | 0      |
| OGC-074     | Everolimus               | -9.70  | 0     | 0     | 0    | 0      |
| OGC-074     | Everolimus               | -8.70  | 0     | 0     | 0    | 0      |
| OGC-074     | Everolimus               | -7.70  | 0     | 0     | 0    | 6.46   |
| OGC-074     | Everolimus               | -6.70  | 0     | 0     | 0    | 0      |
| OGC-074     | Everolimus               | -5.70  | 0     | 0     | 0    | 0      |
| OGC-075     | Dasatinib                | -8.60  | 0     | 0     | 0    | 0      |
| OGC-075     | Dasatinib                | -7.00  | 0     | 0     | 0    | 0      |

| Compound ID | Compound name             | Log[M] | BRAF  | EGFR   | KRAS | PIK3CA |
|-------------|---------------------------|--------|-------|--------|------|--------|
| OGC-075     | Dasatinib                 | -5.40  | 0     | 1.32   | 0    | 0      |
| OGC-076     | Compound C                | -5.30  | 0     | 0      | 0    | 0      |
| OGC-076     | Compound C                | -5.00  | 0     | 0      | 0    | 0      |
| OGC-076     | Compound C                | -4.70  | 0     | 0      | 0    | 0      |
| OGC-077     | Rimonabant                | -5.30  | 0     | 0      | 0    | 0      |
| OGC-077     | Rimonabant                | -4.82  | 0     | 0      | 0    | 0      |
| OGC-077     | Rimonabant                | -4.39  | 0.02  | 0.08   | 0    | 0.08   |
| OGC-077     | Rimonabant                | -4.35  | -0.04 | 0      | 0    | 0      |
| OGC-078     | Anandamide                | -4.52  | 0     | 0      | 0    | 0      |
| OGC-078     | Anandamide                | -4.19  | 0     | 0      | 0    | 0      |
| OGC-078     | Anandamide                | -4.05  | 0     | 0      | 0    | 0      |
| OGC-078     | Anandamide                | -3.89  | 0     | 0      | 0    | 0      |
| OGC-078     | Anandamide                | -3.57  | 0     | 0      | 0    | 0      |
| OGC-079     | Met-F-AEA                 | -4.40  | 0.3   | 0      | 0    | 0      |
| OGC-079     | Met-F-AEA                 | -4.10  | -1.22 | 0      | 0    | 0      |
| OGC-079     | Met-F-AEA                 | -3.80  | -1    | 0      | 0    | 0      |
| OGC-080     | JWH-015                   | -4.16  | 0     | 0      | 0    | 0      |
| OGC-080     | JWH-015                   | -3.85  | 0     | 0      | 0    | 0      |
| OGC-080     | JWH-015                   | -3.55  | 0     | 0      | 0    | 0      |
| OGC-081     | 17-AAG                    | -7.40  | 0     | 0      | 0    | 0      |
| OGC-081     | 17-AAG                    | -6.70  | 0     | 0      | 0    | 0      |
| OGC-081     | 17-AAG                    | -6.40  | 0.42  | -12.18 | 0    | 0      |
| OGC-081     | 17-AAG                    | -6.00  | 0     | -11.7  | 0    | 0      |
| OGC-081     | 17-AAG                    | -5.70  | 0.08  | 0      | 0    | 3      |
| OGC-082     | Doxorubicin hydrochloride | -9.00  | 0     | 0      | 0    | 0      |
| OGC-082     | Doxorubicin hydrochloride | -7.00  | 5.94  | 0      | 0    | 0      |
| OGC-082     | Doxorubicin hydrochloride | -5.00  | 0     | 0.92   | 0    | 0      |
| OGC-083     | 5-Fluorouracil            | -5.52  | -1.02 | 0      | 0    | 0      |
| OGC-083     | 5-Fluorouracil            | -5.40  | 0     | 0      | 0    | 0      |
| OGC-083     | 5-Fluorouracil            | -4.52  | 0     | 0      | 0    | 0      |
| OGC-083     | 5-Fluorouracil            | -4.40  | 0     | 0      | 0    | 0      |
| OGC-083     | 5-Fluorouracil            | -3.52  | 0     | 0      | 0    | 0      |
| OGC-083     | 5-Fluorouracil            | -3.40  | 0     | 0      | 0    | 0      |
| OGC-084     | Cisplatin                 | -7.00  | 0     | 0      | 0    | 0      |
| OGC-084     | Cisplatin                 | -6.70  | 0     | 0      | 0    | 0      |
| OGC-084     | Cisplatin                 | -6.00  | 0     | 0      | 0    | 0      |
| OGC-084     | Cisplatin                 | -5.70  | 7.62  | 0      | 0    | 0      |
| OGC-084     | Cisplatin                 | -5.00  | 0     | 4.84   | 0    | 0      |
| OGC-084     | Cisplatin                 | -4.70  | 3.82  | 0      | 0    | 0      |
| OGC-085     | Sulindac                  | -4.20  | 0     | 0      | 0    | 0      |
| OGC-085     | Sulindac                  | -3.70  | 0     | 0      | 0    | 0      |
| OGC-085     | Sulindac                  | -3.60  | 1.64  | 0      | 0    | 0      |
| OGC-085     | Sulindac                  | -3.22  | 0     | 0      | 0    | 0      |
| OGC-085     | Sulindac                  | -3.00  | 0     | 0      | 0    | 0      |
| OGC-085     | Sulindac                  | -2.75  | 0     | 0      | 0    | 0      |
| OGC-086     | Sulindac sulfide          | -4.52  | 0.3   | 1.54   | 0    | 0      |
| OGC-086     | Sulindac sulfide          | -4.22  | -0.28 | 0      | 0    | 0      |
| OGC-086     | Sulindac sulfide          | -3.92  | 1.84  | 0      | 0    | 0      |
| OGC-087     | 17-DMAG                   | -8.40  | 0     | 0      | 0    | 0      |
| OGC-087     | 17-DMAG                   | -8.10  | 0     | 0      | 0    | 0      |
| OGC-087     | 17-DMAG                   | -7.70  | 0     | -8.56  | 0    | 0      |
| OGC-087     | 17-DMAG                   | -7.40  | 0     | 0      | 0    | 0      |
| OGC-087     | 17-DMAG                   | -7.00  | 0     | 0      | 0    | 0      |
| OGC-087     | 17-DMAG                   | -6.89  | 0     | -12.5  | 0    | 0      |
| OGC-087     | 17-DMAG                   | -6.19  | 0     | -1.5   | 0    | 0      |
| OGC-088     | Trastuzumab               | -6.70  | 0     | 0      | 0    | 0      |
| OGC-088     | Trastuzumab               | -5.70  | 0     | -0.46  | 0    | 0      |
| OGC-088     | Trastuzumab               | -4.70  | 0     | -1.48  | 0    | 0      |
| OGC-089     | THC                       | -4.60  | 0.46  | 0      | 0    | 0      |
| OGC-089     | THC                       | -4.00  | 0.3   | 0      | 0    | 0      |
| OGC-089     | THC                       | -3.40  | 0.88  | 0      | 0    | 0      |
| OGC-090     | Parthenolide              | -6.18  | 0     | -4.66  | 0    | 0      |
| OGC-090     | Parthenolide              | -5.82  | 0     | 0      | 0    | 0      |
| OGC-090     | Parthenolide              | -5.52  | 0     | 0      | 0    | 0      |
| OGC-090     | Parthenolide              | -5.22  | 0     | 0      | 0    | 0      |



| Compound ID | Compound name      | Log[M] | BRAF  | EGFR | KRAS | PIK3CA |
|-------------|--------------------|--------|-------|------|------|--------|
| OGC-091     | Pseudolaric acid B | -6.48  | 0     | 0    | 0    | 0      |
| OGC-091     | Pseudolaric acid B | -6.00  | 5.04  | 0    | 0    | 0      |
| OGC-091     | Pseudolaric acid B | -5.52  | 0     | 0    | 0    | 0      |
| OGC-092     | Irinotecan         | -6.52  | 0     | 0    | 0    | 0      |
| OGC-092     | Irinotecan         | -5.52  | 0     | 0    | 0    | 0      |
| OGC-093     | Vinorelbine        | -9.40  | 0     | 0    | 0    | 0      |
| OGC-093     | Vinorelbine        | -8.40  | 0     | 0    | 0    | 0      |
| OGC-093     | Vinorelbine        | -7.40  | 0     | 0    | 0    | 0      |
| OGC-095     | BML-190            | -3.90  | 0     | 0    | 0    | 0.72   |
| OGC-095     | BML-190            | -3.60  | 0     | 0    | 0    | 0      |
| OGC-095     | BML-190            | -3.30  | 0     | 0    | 0    | 0      |
| OGC-096     | AM404              | -4.70  | -1.68 | 0    | 0    | 0      |
| OGC-096     | AM404              | -4.10  | -0.12 | 0    | 0    | 0      |
| OGC-097     | PI-103             | -8.00  | 0     | 0    | 0    | 0      |
| OGC-097     | PI-103             | -7.00  | 0     | 0    | 0    | 0      |
| OGC-097     | PI-103             | -6.00  | 0     | 3.9  | 0    | 0      |
| OGC-098     | ZSTK404            | -6.70  | 0     | 0    | 0    | 0      |
| OGC-098     | ZSTK404            | -5.70  | 0     | 0    | 0    | 0      |
| OGC-098     | ZSTK404            | -4.70  | 0     | 2.5  | 0    | 0      |

The statistically significant  $\Delta$ KI values (determined by the difference between the percent of growth inhibition at a given drug concentration between WT and KI cells) were scaled down fivefold, to allow effective visualization in GEDAS (see *SI Methods*). Each value point represents the averaged response of multiple isogenic clones for each genotype.

**Table S3. Primers used for the amplification of the homology arms of the targeting vectors.**

| Gene   | Amino acid mutation | Arm | gDNA source | Primers (F, forward; R, reverse)                                                                                      | Restriction sites     |
|--------|---------------------|-----|-------------|-----------------------------------------------------------------------------------------------------------------------|-----------------------|
| BRAF   | V600E               | 5'  | HT-29       | F tgaaaaGAATTCGCGGCCGC <i>Cataacttcgtataatgtatgctatacga agttatgtttcatgctaagttcgat</i>                                 | EcoRI, NotI, loxP     |
|        |                     | 3'  | hTERT-RPE1  | R aaataaGAATTCgtattttgtgaatactgggaac<br>F tcacaaTCTAGAggttcttattttatgta<br>R ctactTCTAGAagcagccagtcactcct             | EcoRI<br>XbaI<br>XbaI |
| EGFR   | delE746-A750        | 5'  | GenScript*  | F ggaaatGAATTCGCGGCCGC <i>Cataacttcgtataatgtatgctatacga gttatatcagtggtcctgtgag</i>                                    | EcoRI, NotI, loxP     |
|        |                     | 3'  | hTERT-RPE1  | R ccactGAATTCagaaagggaaagacatagaaa<br>F cttccGCTAGCagctctagtggtataactccc<br>R tacacaGCTAGCgtgagggccagagattgta         | EcoRI<br>NheI<br>NheI |
| KRAS   | G13D                | 5'  | hTERT-RPE1  | F taggcgGAATTCGCGGCCGCggtcactgcatctctta<br>R tgactgGAATTCgtatcgtaatgaactgtacttc                                       | EcoRI, NotI<br>EcoRI  |
|        |                     | 3'  | DLD1        | F cttacTCTAGAcgtctgcagtcaactggaat<br>R gacagtTCTAGA <i>Aataacttcgtatagcatacattatacgaagtatatatctct catctgcttgggatg</i> | XbaI<br>XbaI, loxP    |
| PIK3CA | H1047R              | 5'  | HCT116      | F ggtttcGAATTCGCGGCCGCgctggtcttgaactccaa<br>R ttggagGAATTCatgtaataccttcaggtctttgc                                     | EcoRI, NotI<br>EcoRI  |
|        |                     | 3'  | HCT116      | F aggtatTCTAGAcatttgctccaaactgacca<br>R tgtccaTCTAGA <i>AataacttcgtataatgtatgctatacgaagttatGTGAC TGCTTCCAAA</i> ACTGC | XbaI<br>Xba I, loxP   |

The position of the mutated residues and the source of genomic DNA used for the PCR amplification are also indicated.

\*Custom synthesized by Genscript.
